# Supplementary material for: LixV2O5/LiV3O8 nanoflakes with significantly improved electrochemical performance for Li-ion batteries
Source: Royal Society of Chemistry journal article supplement (doi:10.1039/c4ta00868e), 2014-01-01
Supplement: c4ta00868e1.pdf [file c4ta00868e1.pdf]

## Supporting Information

### $\text{Li}_x\text{V}_2\text{O}_5/\text{LiV}_3\text{O}_8$ nanoflakes with significantly improved electrochemical properties for Li-ion batteries

Dan Sun<sup>a</sup>, Guanhua Jin<sup>a</sup>, Haiyan Wang<sup>a\*</sup>, Xiaobing Huang<sup>b</sup>, Yu Ren<sup>c</sup>, Jiecao Jiang<sup>a</sup>, Hanna He<sup>a</sup> and Yougen Tang<sup>a</sup>

<sup>a</sup> Key Laboratory of Resources Chemistry of Nonferrous Metals, Ministry of Education, College of Chemistry and Chemical Engineering, Central South University, Changsha, 410083, P.R China

<sup>b</sup> College of Chemistry and Chemical Engineering, Hunan University of Arts and Science, Changde 415000, P.R. China

<sup>c</sup> New Energy Center, National Institute of Clean-and-low-carbon Energy, Beijing, 102209, P.R China

E-mail: [wanghy419@126.com](mailto:wanghy419@126.com) (H. Wang)

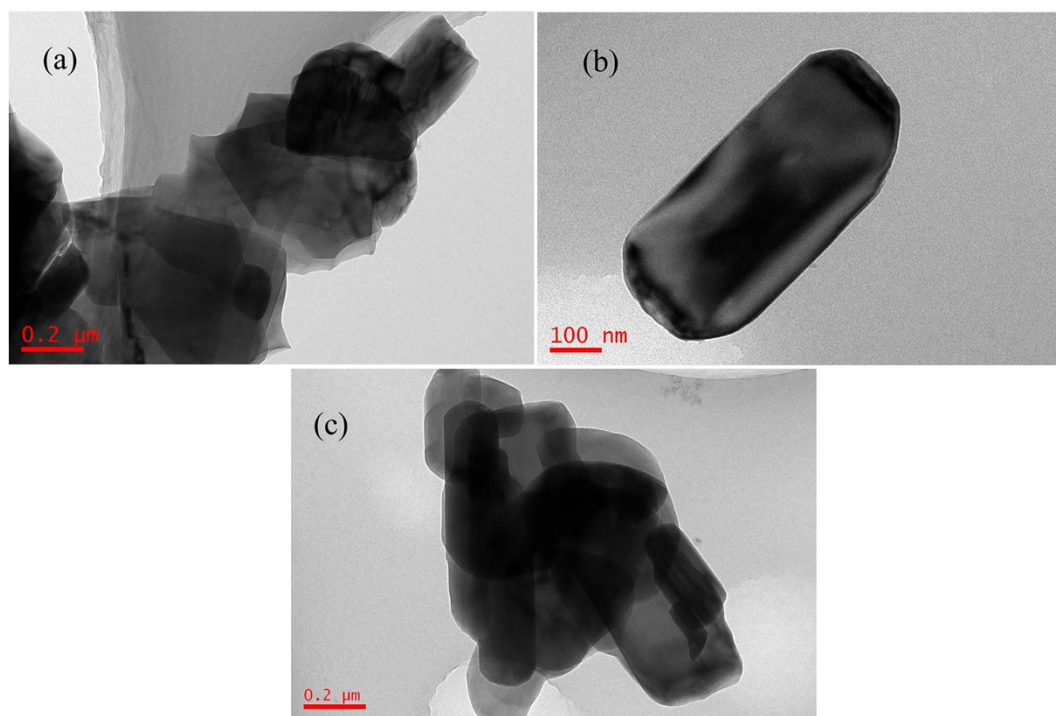

Fig. S1 TEM images of LVO (a), LVO-5 (b), and LVO-30 (c).

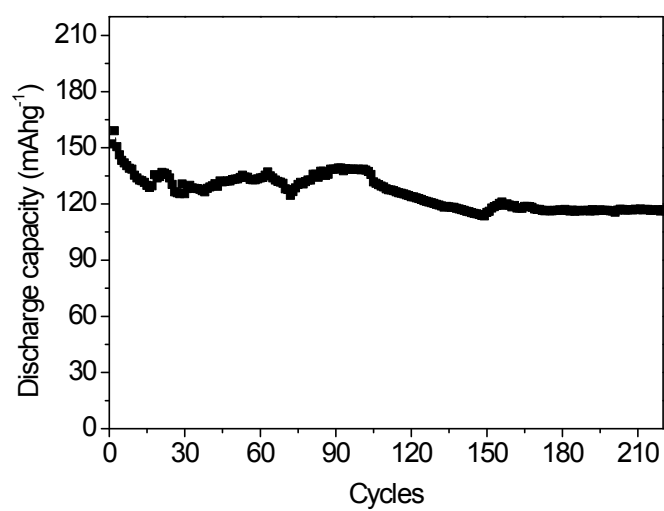

Fig. S2 Cycling performance of LVO-30 at 1C

Table S1 The calculated parameters of LVO-5 electrodes after different cycles.

| Samples                | a/nm    | b/nm    | c/nm    | $\beta$ |
|------------------------|---------|---------|---------|---------|
| LVO-5 after 2 cycles   | 0.66947 | 0.36277 | 1.20100 | 107.29° |
| LVO-5 after 200 cycles | 0.66484 | 0.36150 | 1.20993 | 107.15° |
| Variation ratio        | 0.69%   | 0.35%   | 0.74%   | 0.13%   |
